# Supplementary material
Source: Springer Nature journal article supplement (https://www.springermedizin.de/resource/supplementary/12962_2012_153_MOESM1_ESM.pdf/9571812)

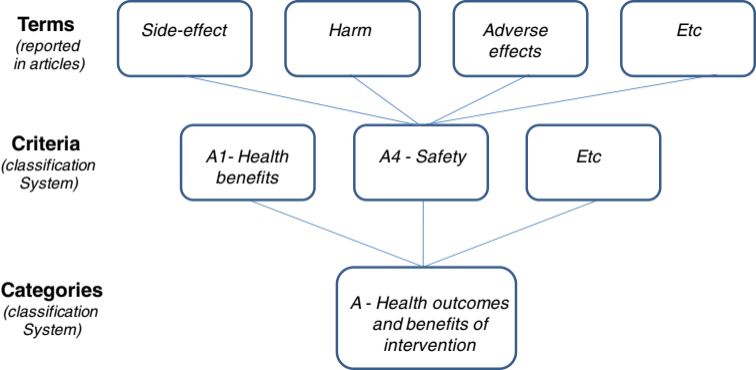

Supplement: MOESM1 [file 9571812]
